# Supplementary material
Source: Springer Nature journal article supplement (https://www.springermedizin.de/resource/supplementary/13063_2010_598_MOESM3_ESM.pdf/9618834)
Supplement: MOESM3 [file 9618834]

**Myocardial infarction**

**Unstable angina requiring  
hospitalization**

**Stroke and Ischemic Transitory Attack**

**Heart failure requiring hospitalization**

**Peripheral vascular disease requiring  
hospitalization**

**New subclinical evidence of vascular  
atherosclerotic disease**

**Sudden death**
